# Supplementary material
Source: PubMed Central journal article supplement (PMC4879886)
Supplement: NIHMS778389-supplement-5.pdf [file NIHMS778389-supplement-5.pdf]

Supplementary Figure S1

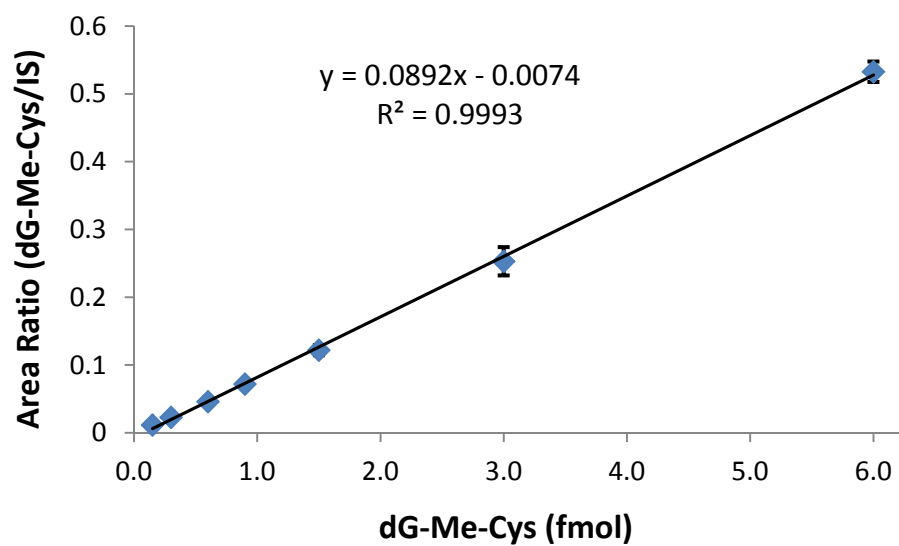

**Supplementary Figure S1.** Typical calibration curve used for the quantification of dG-Me-Cys with the linearity from 0.15 to 6.0 fmol. The data represent the mean value  $\pm$  standard deviation from three individual experiments.

Supplementary Figure S2

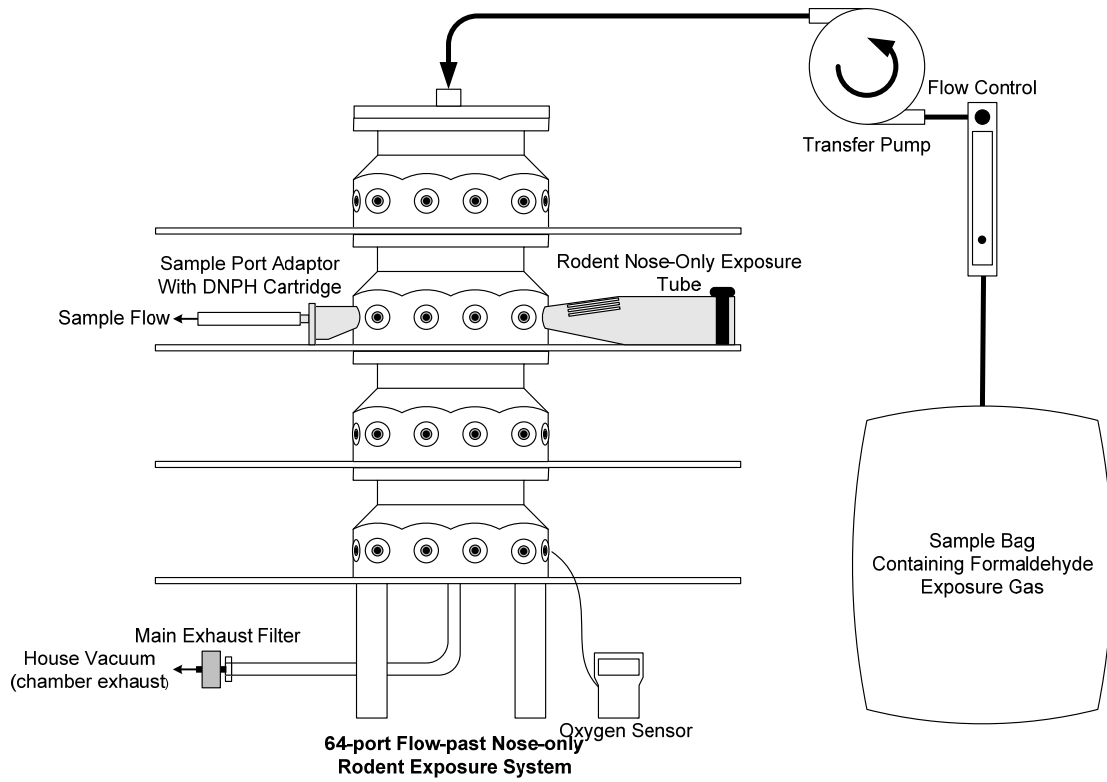

**Supplementary Figure S2.** Schematic of rat nose only inhalation chamber.

Supplementary Figure S3

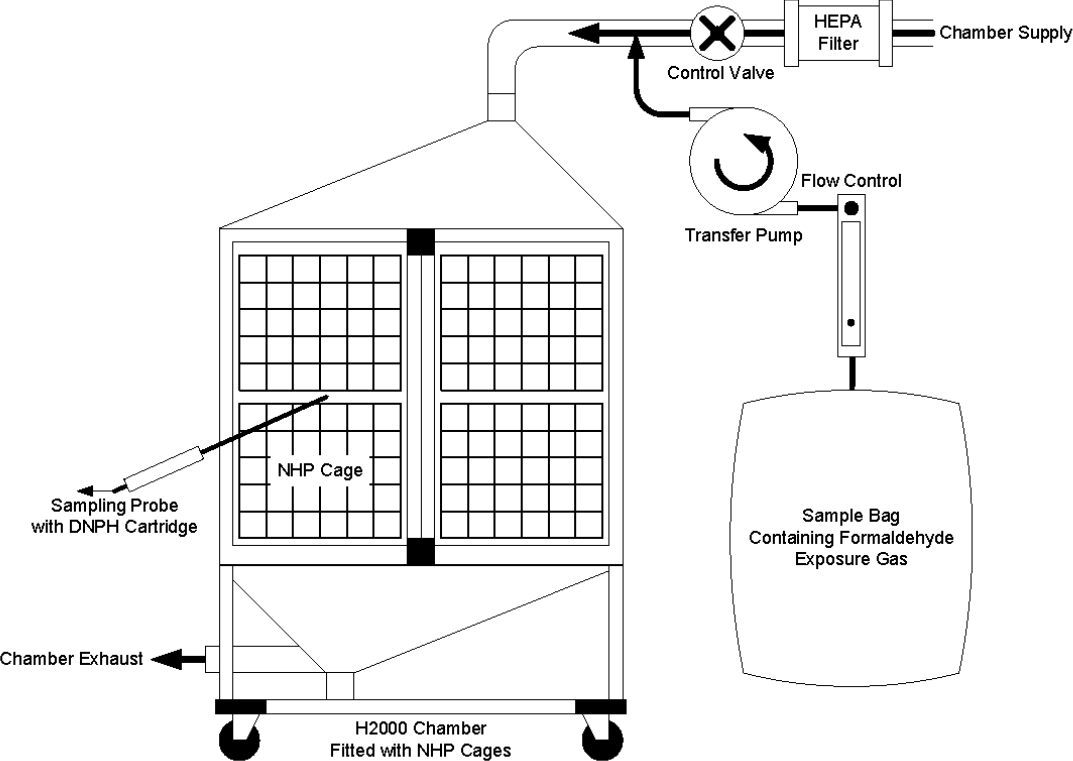

Supplementary Figure S3. Schematic of primate whole-body inhalation chamber.
